# Supplementary material
Source: publisher figshare collection journal article supplement (https://acs.figshare.com/ndownloader/files/4711513)
Supplement: Supplementary file 1 [file 4711513]

  
data_gd4 
  
_audit_creation_method            SHELXL-97 
_chemical_name_systematic 
; 
 ? 
; 
_chemical_name_common             ? 
_chemical_melting_point           ? 
_chemical_formula_moiety          
 'C26 H32 Hf N2' 
_chemical_formula_sum 
 'C33 H40 Hf N2' 
_chemical_formula_weight          643.16 
  
loop_ 
 _atom_type_symbol 
 _atom_type_description 
 _atom_type_scat_dispersion_real 
 _atom_type_scat_dispersion_imag 
 _atom_type_scat_source 
 'C'  'C'   0.0033   0.0016 
 'International Tables Vol C Tables 4.2.6.8 and 6.1.1.4' 
 'H'  'H'   0.0000   0.0000 
 'International Tables Vol C Tables 4.2.6.8 and 6.1.1.4' 
 'N'  'N'   0.0061   0.0033 
 'International Tables Vol C Tables 4.2.6.8 and 6.1.1.4' 
 'Hf'  'Hf'  -0.5830   6.1852 
 'International Tables Vol C Tables 4.2.6.8 and 6.1.1.4' 
  
_symmetry_cell_setting            Triclinic 
_symmetry_space_group_name_H-M    P-1 
  
loop_ 
 _symmetry_equiv_pos_as_xyz 
 'x, y, z' 
 '-x, -y, -z' 
  
_cell_length_a                    11.0762(7) 
_cell_length_b                    11.9530(8) 
_cell_length_c                    12.8362(9) 
_cell_angle_alpha                 79.555(3) 
_cell_angle_beta                  66.820(3) 
_cell_angle_gamma                 67.872(3) 
_cell_volume                      1446.09(17) 
_cell_formula_units_Z             2 
_cell_measurement_temperature     173(2) 
_cell_measurement_reflns_used     9686 
_cell_measurement_theta_min       0.00 
_cell_measurement_theta_max       0.00 
  
_exptl_crystal_description        plate 
_exptl_crystal_colour             red 
_exptl_crystal_size_max           0.30 
_exptl_crystal_size_mid           0.15 
_exptl_crystal_size_min           0.05 
_exptl_crystal_density_meas       0 
_exptl_crystal_density_diffrn     1.477 
_exptl_crystal_density_method     'not measured' 
_exptl_crystal_F_000              648 
_exptl_absorpt_coefficient_mu     3.630 
_exptl_absorpt_correction_type    none 
_exptl_absorpt_correction_T_min   0.4090 
_exptl_absorpt_correction_T_max   0.8394 
_exptl_absorpt_process_details    ? 
  
_exptl_special_details 
; 
 ? 
; 
  
_diffrn_ambient_temperature       173(2) 
_diffrn_radiation_wavelength      0.71073 
_diffrn_radiation_type            MoK\a 
_diffrn_radiation_source          'fine-focus sealed tube' 
_diffrn_radiation_monochromator   graphite 
_diffrn_measurement_device_type   'Bruker X8 APEX II diffractometer' 
_diffrn_measurement_method        'phi and omega scans' 
_diffrn_detector_area_resol_mean  ? 
_diffrn_standards_number          ? 
_diffrn_standards_interval_count  ? 
_diffrn_standards_interval_time   ? 
_diffrn_standards_decay_%         ? 
_diffrn_reflns_number             58051 
_diffrn_reflns_av_R_equivalents   0.0299 
_diffrn_reflns_av_sigmaI/netI     0.0279 
_diffrn_reflns_limit_h_min        -18 
_diffrn_reflns_limit_h_max        17 
_diffrn_reflns_limit_k_min        -19 
_diffrn_reflns_limit_k_max        19 
_diffrn_reflns_limit_l_min        -21 
_diffrn_reflns_limit_l_max        21 
_diffrn_reflns_theta_min          1.73 
_diffrn_reflns_theta_max          36.32 
_reflns_number_total              13821 
_reflns_number_gt                 12073 
_reflns_threshold_expression      >2sigma(I) 
  
_computing_data_collection        'Bruker APEX2' 
_computing_cell_refinement        'Bruker SAINT+' 
_computing_data_reduction         'Bruker SAINT+' 
_computing_structure_solution     'SHELXS-97 (Sheldrick, 1990)' 
_computing_structure_refinement   'SHELXL-97 (Sheldrick, 1997)' 
_computing_molecular_graphics     'Bruker SHELXTL' 
_computing_publication_material   'Bruker SHELXTL' 
  
_refine_special_details 
; 
 Refinement of F^2^ against ALL reflections.  The weighted R-factor wR and 
 goodness of fit S are based on F^2^, conventional R-factors R are based 
 on F, with F set to zero for negative F^2^. The threshold expression of 
 F^2^ > 2sigma(F^2^) is used only for calculating R-factors(gt) etc. and is 
 not relevant to the choice of reflections for refinement.  R-factors based 
 on F^2^ are statistically about twice as large as those based on F, and R- 
 factors based on ALL data will be even larger. 
; 
  
_refine_ls_structure_factor_coef  Fsqd 
_refine_ls_matrix_type            full 
_refine_ls_weighting_scheme       calc 
_refine_ls_weighting_details 
 'calc w=1/[\s^2^(Fo^2^)+(0.0325P)^2^+0.0651P] where P=(Fo^2^+2Fc^2^)/3' 
_atom_sites_solution_primary      direct 
_atom_sites_solution_secondary    difmap 
_atom_sites_solution_hydrogens    mixed 
_refine_ls_hydrogen_treatment     mixed 
_refine_ls_extinction_method      none 
_refine_ls_extinction_coef        ? 
_refine_ls_number_reflns          13821 
_refine_ls_number_parameters      399 
_refine_ls_number_restraints      0 
_refine_ls_R_factor_all           0.0296 
_refine_ls_R_factor_gt            0.0224 
_refine_ls_wR_factor_ref          0.0566 
_refine_ls_wR_factor_gt           0.0541 
_refine_ls_goodness_of_fit_ref    1.029 
_refine_ls_restrained_S_all       1.029 
_refine_ls_shift/su_max           0.264 
_refine_ls_shift/su_mean          0.006 
  
loop_ 
 _atom_site_label 
 _atom_site_type_symbol 
 _atom_site_fract_x 
 _atom_site_fract_y 
 _atom_site_fract_z 
 _atom_site_U_iso_or_equiv 
 _atom_site_adp_type 
 _atom_site_occupancy 
 _atom_site_symmetry_multiplicity 
 _atom_site_calc_flag 
 _atom_site_refinement_flags 
 _atom_site_disorder_assembly 
 _atom_site_disorder_group 
Hf1 Hf 0.681162(5) 0.257514(5) 0.169353(4) 0.02092(2) Uani 1 1 d . . . 
N1 N 0.58813(12) 0.19495(10) 0.33296(9) 0.01902(19) Uani 1 1 d . . . 
N2 N 0.71293(12) 0.05668(11) 0.16535(10) 0.0215(2) Uani 1 1 d . . . 
C1 C 0.57767(16) 0.07623(13) 0.36119(12) 0.0239(2) Uani 1 1 d . . . 
C2 C 0.65540(15) -0.00029(13) 0.26239(12) 0.0226(2) Uani 1 1 d . . . 
C3 C 0.6718(2) -0.12246(15) 0.26598(15) 0.0326(3) Uani 1 1 d . . . 
C4 C 0.7573(2) -0.18697(16) 0.17029(17) 0.0360(4) Uani 1 1 d . . . 
C5 C 0.81317(18) -0.12723(15) 0.06826(15) 0.0306(3) Uani 1 1 d . . . 
C6 C 0.78980(15) -0.00424(14) 0.06834(13) 0.0245(3) Uani 1 1 d . . . 
C7 C 0.83884(15) 0.07211(15) -0.03108(12) 0.0265(3) Uani 1 1 d . . . 
C8 C 0.91622(19) 0.02645(18) -0.13957(14) 0.0368(4) Uani 1 1 d . . . 
C9 C 0.9536(2) 0.1041(2) -0.23042(16) 0.0449(5) Uani 1 1 d . . . 
C10 C 0.9144(2) 0.2257(2) -0.21413(15) 0.0440(5) Uani 1 1 d . . . 
C11 C 0.8389(2) 0.27025(19) -0.10625(15) 0.0378(4) Uani 1 1 d . . . 
C12 C 0.79890(17) 0.19451(15) -0.01114(13) 0.0288(3) Uani 1 1 d . . . 
C13 C 0.51442(18) 0.42023(15) 0.14420(15) 0.0314(3) Uani 1 1 d . . . 
H13A H 0.4375 0.3974 0.1459 0.047 Uiso 1 1 calc R . . 
H13B H 0.5510 0.4598 0.0707 0.047 Uiso 1 1 calc R . . 
H13C H 0.4804 0.4760 0.2048 0.047 Uiso 1 1 calc R . . 
C14 C 0.83248(17) 0.33038(16) 0.17925(15) 0.0314(3) Uani 1 1 d . . . 
H14A H 0.7894 0.3791 0.2465 0.047 Uiso 1 1 calc R . . 
H14B H 0.8600 0.3810 0.1111 0.047 Uiso 1 1 calc R . . 
H14C H 0.9151 0.2634 0.1845 0.047 Uiso 1 1 calc R . . 
C15 C 0.53290(13) 0.26579(12) 0.43087(11) 0.0184(2) Uani 1 1 d . . . 
C16 C 0.39186(14) 0.34205(12) 0.46924(12) 0.0210(2) Uani 1 1 d . . . 
C17 C 0.34302(16) 0.41017(14) 0.56381(13) 0.0267(3) Uani 1 1 d . . . 
C18 C 0.42923(18) 0.40470(15) 0.61987(14) 0.0293(3) Uani 1 1 d . . . 
C19 C 0.56613(17) 0.32801(15) 0.58347(13) 0.0267(3) Uani 1 1 d . . . 
C20 C 0.61969(14) 0.25721(12) 0.49056(11) 0.0206(2) Uani 1 1 d . . . 
C21 C 0.28997(14) 0.34570(14) 0.41569(13) 0.0247(3) Uani 1 1 d . . . 
C22 C 0.20228(19) 0.47400(18) 0.39213(19) 0.0368(4) Uani 1 1 d . . . 
C23 C 0.19337(18) 0.27606(18) 0.49214(17) 0.0361(4) Uani 1 1 d . . . 
H23A H 0.2492 0.1918 0.5021 0.054 Uiso 1 1 calc R . . 
H23B H 0.1281 0.2789 0.4570 0.054 Uiso 1 1 calc R . . 
H23C H 0.1410 0.3130 0.5662 0.054 Uiso 1 1 calc R . . 
C24 C 0.76773(15) 0.16827(14) 0.46033(13) 0.0253(3) Uani 1 1 d . . . 
C25 C 0.87352(18) 0.22616(18) 0.45241(18) 0.0364(4) Uani 1 1 d . . . 
H25A H 0.8570 0.3032 0.4089 0.055 Uiso 1 1 calc R . . 
H25B H 0.9683 0.1718 0.4144 0.055 Uiso 1 1 calc R . . 
H25C H 0.8628 0.2404 0.5289 0.055 Uiso 1 1 calc R . . 
C26 C 0.77374(19) 0.06281(16) 0.54836(17) 0.0375(4) Uani 1 1 d . . . 
H26A H 0.7546 0.0923 0.6216 0.056 Uiso 1 1 calc R . . 
H26B H 0.8668 0.0012 0.5235 0.056 Uiso 1 1 calc R . . 
H26C H 0.7037 0.0275 0.5562 0.056 Uiso 1 1 calc R . . 
H1B H 0.614(2) 0.0310(19) 0.4206(18) 0.033(5) Uiso 1 1 d . . . 
H5 H 0.863(2) -0.166(2) 0.0090(19) 0.033(5) Uiso 1 1 d . . . 
H3 H 0.635(2) -0.156(2) 0.329(2) 0.033(6) Uiso 1 1 d . . . 
H19 H 0.626(2) 0.3199(19) 0.6162(18) 0.030(5) Uiso 1 1 d . . . 
H4 H 0.771(2) -0.265(2) 0.1744(19) 0.037(6) Uiso 1 1 d . . . 
H18 H 0.394(2) 0.458(2) 0.6796(19) 0.035(6) Uiso 1 1 d . . . 
H11 H 0.817(2) 0.3525(19) -0.0996(16) 0.024(5) Uiso 1 1 d . . . 
H10 H 0.937(2) 0.277(2) -0.278(2) 0.041(6) Uiso 1 1 d . . . 
H17 H 0.244(2) 0.4635(19) 0.5910(17) 0.030(5) Uiso 1 1 d . . . 
H1A H 0.483(3) 0.079(2) 0.388(2) 0.047(7) Uiso 1 1 d . . . 
H9 H 1.011(3) 0.066(2) -0.308(2) 0.043(6) Uiso 1 1 d . . . 
H8 H 0.939(2) -0.055(2) -0.1493(18) 0.036(6) Uiso 1 1 d . . . 
C1S C 0.4580(3) -0.2121(3) 0.1240(2) 0.0642(7) Uani 1 1 d . . . 
H1S1 H 0.4222 -0.2796 0.1439 0.096 Uiso 1 1 calc R . . 
H1S2 H 0.3839 -0.1370 0.1172 0.096 Uiso 1 1 calc R . . 
H1S3 H 0.4894 -0.2051 0.1833 0.096 Uiso 1 1 calc R . . 
C2S C 0.5784(2) -0.2345(2) 0.01302(16) 0.0407(4) Uani 1 1 d . . . 
C3S C 0.6929(3) -0.3386(2) -0.0018(2) 0.0472(5) Uani 1 1 d . . . 
H3SA H 0.6944 -0.3976 0.0586 0.057 Uiso 1 1 calc R . . 
C4S C 0.8044(3) -0.3585(3) -0.1020(2) 0.0592(7) Uani 1 1 d . . . 
H4SA H 0.8825 -0.4308 -0.1109 0.071 Uiso 1 1 calc R . . 
C5S C 0.8025(3) -0.2738(3) -0.1889(2) 0.0664(8) Uani 1 1 d . . . 
H5SA H 0.8802 -0.2870 -0.2582 0.080 Uiso 1 1 calc R . . 
C6S C 0.6901(4) -0.1705(3) -0.1772(2) 0.0680(8) Uani 1 1 d . . . 
H6SA H 0.6899 -0.1127 -0.2387 0.082 Uiso 1 1 calc R . . 
C7S C 0.5755(3) -0.1486(2) -0.0758(2) 0.0522(5) Uani 1 1 d . . . 
H7SA H 0.4972 -0.0766 -0.0677 0.063 Uiso 1 1 calc R . . 
H24 H 0.795(2) 0.1368(19) 0.3819(17) 0.029(5) Uiso 1 1 d . . . 
H22C H 0.259(2) 0.524(2) 0.3505(19) 0.040(6) Uiso 1 1 d . . . 
H22B H 0.137(3) 0.506(3) 0.463(3) 0.063(8) Uiso 1 1 d . . . 
H22A H 0.149(3) 0.472(2) 0.346(2) 0.051(7) Uiso 1 1 d . . . 
H21 H 0.3462(19) 0.3096(17) 0.3442(16) 0.020(4) Uiso 1 1 d . . . 
  
loop_ 
 _atom_site_aniso_label 
 _atom_site_aniso_U_11 
 _atom_site_aniso_U_22 
 _atom_site_aniso_U_33 
 _atom_site_aniso_U_23 
 _atom_site_aniso_U_13 
 _atom_site_aniso_U_12 
Hf1 0.02264(3) 0.02020(3) 0.01762(3) 0.00060(2) -0.00466(2) -0.00807(2) 
N1 0.0207(5) 0.0175(5) 0.0171(5) -0.0008(4) -0.0046(4) -0.0067(4) 
N2 0.0214(5) 0.0224(5) 0.0192(5) -0.0024(4) -0.0057(4) -0.0066(4) 
C1 0.0257(6) 0.0220(6) 0.0214(6) -0.0017(5) -0.0039(5) -0.0098(5) 
C2 0.0259(6) 0.0217(6) 0.0217(6) 0.0002(5) -0.0082(5) -0.0104(5) 
C3 0.0462(9) 0.0218(7) 0.0283(7) 0.0001(6) -0.0096(7) -0.0141(6) 
C4 0.0444(9) 0.0202(7) 0.0388(9) -0.0063(6) -0.0111(7) -0.0077(6) 
C5 0.0334(7) 0.0266(7) 0.0285(7) -0.0084(6) -0.0090(6) -0.0055(6) 
C6 0.0227(6) 0.0273(7) 0.0218(6) -0.0045(5) -0.0078(5) -0.0050(5) 
C7 0.0241(6) 0.0320(7) 0.0196(6) -0.0032(5) -0.0058(5) -0.0065(5) 
C8 0.0349(8) 0.0392(9) 0.0229(7) -0.0074(6) -0.0051(6) -0.0009(7) 
C9 0.0393(9) 0.0577(13) 0.0211(7) -0.0050(8) -0.0018(7) -0.0064(9) 
C10 0.0423(10) 0.0541(12) 0.0216(7) 0.0063(7) -0.0012(7) -0.0156(9) 
C11 0.0434(9) 0.0390(10) 0.0230(7) 0.0024(6) -0.0032(6) -0.0161(8) 
C12 0.0295(7) 0.0317(8) 0.0205(6) 0.0009(5) -0.0048(5) -0.0106(6) 
C13 0.0330(7) 0.0285(7) 0.0308(7) 0.0069(6) -0.0134(6) -0.0099(6) 
C14 0.0293(7) 0.0288(7) 0.0345(8) -0.0007(6) -0.0076(6) -0.0125(6) 
C15 0.0189(5) 0.0160(5) 0.0177(5) 0.0000(4) -0.0047(4) -0.0055(4) 
C16 0.0187(5) 0.0182(5) 0.0220(6) -0.0002(4) -0.0042(4) -0.0054(4) 
C17 0.0244(6) 0.0206(6) 0.0270(7) -0.0050(5) -0.0040(5) -0.0026(5) 
C18 0.0341(7) 0.0245(7) 0.0253(7) -0.0073(5) -0.0067(6) -0.0069(6) 
C19 0.0300(7) 0.0272(7) 0.0248(6) -0.0037(5) -0.0106(5) -0.0096(6) 
C20 0.0208(5) 0.0200(6) 0.0199(5) 0.0002(4) -0.0069(4) -0.0064(4) 
C21 0.0183(5) 0.0254(7) 0.0279(7) -0.0003(5) -0.0078(5) -0.0054(5) 
C22 0.0275(7) 0.0314(8) 0.0471(10) 0.0041(7) -0.0175(7) -0.0034(6) 
C23 0.0267(7) 0.0402(9) 0.0423(9) 0.0019(7) -0.0098(7) -0.0164(7) 
C24 0.0213(6) 0.0257(7) 0.0262(7) -0.0010(5) -0.0099(5) -0.0037(5) 
C25 0.0273(7) 0.0366(9) 0.0473(10) 0.0054(7) -0.0163(7) -0.0129(6) 
C26 0.0355(8) 0.0287(8) 0.0462(10) 0.0070(7) -0.0197(7) -0.0072(7) 
C1S 0.0500(13) 0.106(2) 0.0411(12) 0.0003(13) -0.0161(10) -0.0326(14) 
C2S 0.0405(9) 0.0584(12) 0.0343(9) -0.0005(8) -0.0158(7) -0.0264(9) 
C3S 0.0518(12) 0.0482(12) 0.0561(13) 0.0032(10) -0.0261(10) -0.0274(10) 
C4S 0.0447(11) 0.0711(17) 0.0719(17) -0.0251(13) -0.0163(11) -0.0251(11) 
C5S 0.0577(15) 0.107(3) 0.0487(13) -0.0168(15) -0.0059(11) -0.0509(17) 
C6S 0.094(2) 0.100(2) 0.0409(12) 0.0234(13) -0.0344(14) -0.067(2) 
C7S 0.0625(14) 0.0616(14) 0.0484(12) 0.0087(10) -0.0339(11) -0.0279(12) 
  
_geom_special_details 
; 
 All esds (except the esd in the dihedral angle between two l.s. planes) 
 are estimated using the full covariance matrix.  The cell esds are taken 
 into account individually in the estimation of esds in distances, angles 
 and torsion angles; correlations between esds in cell parameters are only 
 used when they are defined by crystal symmetry.  An approximate (isotropic) 
 treatment of cell esds is used for estimating esds involving l.s. planes. 
; 
  
loop_ 
 _geom_bond_atom_site_label_1 
 _geom_bond_atom_site_label_2 
 _geom_bond_distance 
 _geom_bond_site_symmetry_2 
 _geom_bond_publ_flag 
Hf1 N1 2.0830(11) . ? 
Hf1 C13 2.1986(16) . ? 
Hf1 C14 2.2116(17) . ? 
Hf1 C12 2.2693(15) . ? 
Hf1 N2 2.2985(13) . ? 
N1 C1 1.4362(18) . ? 
N1 C15 1.4357(17) . ? 
N2 C2 1.3475(18) . ? 
N2 C6 1.3539(19) . ? 
C1 C2 1.468(2) . ? 
C2 C3 1.396(2) . ? 
C3 C4 1.370(2) . ? 
C4 C5 1.401(3) . ? 
C5 C6 1.394(2) . ? 
C6 C7 1.470(2) . ? 
C7 C8 1.398(2) . ? 
C7 C12 1.400(2) . ? 
C8 C9 1.382(3) . ? 
C9 C10 1.381(3) . ? 
C10 C11 1.386(3) . ? 
C11 C12 1.408(2) . ? 
C15 C20 1.4137(19) . ? 
C15 C16 1.4136(18) . ? 
C16 C17 1.392(2) . ? 
C16 C21 1.520(2) . ? 
C17 C18 1.382(2) . ? 
C18 C19 1.381(2) . ? 
C19 C20 1.386(2) . ? 
C20 C24 1.5181(19) . ? 
C21 C23 1.533(2) . ? 
C21 C22 1.526(2) . ? 
C24 C26 1.533(2) . ? 
C24 C25 1.534(2) . ? 
C1S C2S 1.500(3) . ? 
C2S C3S 1.378(3) . ? 
C2S C7S 1.391(3) . ? 
C3S C4S 1.369(4) . ? 
C4S C5S 1.365(4) . ? 
C5S C6S 1.364(4) . ? 
C6S C7S 1.395(4) . ? 
  
loop_ 
 _geom_angle_atom_site_label_1 
 _geom_angle_atom_site_label_2 
 _geom_angle_atom_site_label_3 
 _geom_angle 
 _geom_angle_site_symmetry_1 
 _geom_angle_site_symmetry_3 
 _geom_angle_publ_flag 
N1 Hf1 C13 103.58(5) . . ? 
N1 Hf1 C14 106.05(6) . . ? 
C13 Hf1 C14 103.47(7) . . ? 
N1 Hf1 C12 141.05(5) . . ? 
C13 Hf1 C12 100.39(6) . . ? 
C14 Hf1 C12 97.54(6) . . ? 
N1 Hf1 N2 70.96(4) . . ? 
C13 Hf1 N2 130.16(6) . . ? 
C14 Hf1 N2 125.99(5) . . ? 
C12 Hf1 N2 70.11(5) . . ? 
C1 N1 C15 112.76(11) . . ? 
C1 N1 Hf1 124.46(9) . . ? 
C15 N1 Hf1 122.73(9) . . ? 
C2 N2 C6 120.37(13) . . ? 
C2 N2 Hf1 118.59(9) . . ? 
C6 N2 Hf1 121.03(10) . . ? 
N1 C1 C2 111.29(12) . . ? 
N2 C2 C3 121.46(14) . . ? 
N2 C2 C1 114.39(12) . . ? 
C3 C2 C1 124.15(13) . . ? 
C4 C3 C2 118.60(16) . . ? 
C3 C4 C5 119.85(16) . . ? 
C6 C5 C4 118.98(15) . . ? 
N2 C6 C5 120.39(14) . . ? 
N2 C6 C7 113.67(14) . . ? 
C5 C6 C7 125.92(14) . . ? 
C8 C7 C12 121.96(15) . . ? 
C8 C7 C6 122.19(16) . . ? 
C12 C7 C6 115.81(13) . . ? 
C9 C8 C7 119.35(19) . . ? 
C8 C9 C10 120.26(17) . . ? 
C9 C10 C11 120.16(18) . . ? 
C10 C11 C12 121.60(19) . . ? 
C7 C12 C11 116.67(15) . . ? 
C7 C12 Hf1 119.03(11) . . ? 
C11 C12 Hf1 124.28(13) . . ? 
C20 C15 C16 119.85(12) . . ? 
C20 C15 N1 119.63(11) . . ? 
C16 C15 N1 120.50(12) . . ? 
C17 C16 C15 118.60(14) . . ? 
C17 C16 C21 119.07(12) . . ? 
C15 C16 C21 122.21(13) . . ? 
C18 C17 C16 121.47(14) . . ? 
C17 C18 C19 119.64(14) . . ? 
C18 C19 C20 121.25(15) . . ? 
C19 C20 C15 119.12(13) . . ? 
C19 C20 C24 118.50(13) . . ? 
C15 C20 C24 122.30(12) . . ? 
C16 C21 C23 110.03(13) . . ? 
C16 C21 C22 113.01(14) . . ? 
C23 C21 C22 109.41(13) . . ? 
C20 C24 C26 109.99(13) . . ? 
C20 C24 C25 112.99(14) . . ? 
C26 C24 C25 108.97(14) . . ? 
C3S C2S C7S 119.4(2) . . ? 
C3S C2S C1S 120.9(2) . . ? 
C7S C2S C1S 119.7(2) . . ? 
C4S C3S C2S 121.3(2) . . ? 
C5S C4S C3S 119.5(3) . . ? 
C6S C5S C4S 120.6(2) . . ? 
C5S C6S C7S 120.7(2) . . ? 
C2S C7S C6S 118.5(3) . . ? 
  
_diffrn_measured_fraction_theta_max    0.985 
_diffrn_reflns_theta_full              36.32 
_diffrn_measured_fraction_theta_full   0.985 
_refine_diff_density_max    1.717 
_refine_diff_density_min   -1.288 
_refine_diff_density_rms    0.098 
